# Supplementary material for: Hexahalorhenate(iv) salts of metal oxazolidine nitroxides
Source: Royal Society of Chemistry journal article supplement (doi:10.1039/c7dt00752c), 2017-01-01
Supplement: c7dt00752c1.pdf [file c7dt00752c1.pdf]

## Hexahalorhenate(IV) salts of metal oxazolidine nitroxides

Anders H. Pedersen,<sup>a</sup> Blaise L. Geoghegan,<sup>b</sup> Gary S. Nichol,<sup>a</sup> David W. Lupton,<sup>c</sup>  
Keith. S. Murray,<sup>c</sup> José Martínez-Lillo,<sup>d</sup> Ian A. Gass<sup>b</sup> and Euan K. Brechin<sup>a</sup>

---

<sup>a.</sup> *EaStCHEM School of Chemistry, The University of Edinburgh, David Brewster Road, EH9 3FJ Edinburgh, Scotland, United Kingdom.*

<sup>b.</sup> *School of Pharmacy and Biomolecular Sciences, University of Brighton, Brighton BN2 4GJ, United Kingdom.*

<sup>c.</sup> *School of Chemistry, Monash University, Clayton, Victoria 3800, Australia.*

<sup>d.</sup> *Departament de Química Inorgànica/Instituto de Ciencia Molecular (ICMol), Universitat de València, C/Catedrático José Beltrán 2, 46980, Paterna (València) Spain.*

**Table S1.** Crystallographic data for **1a**, **1b**, **2a** and **2a**·150 K.

| Parameters                                                                       | <b>1a</b>                                                                          | <b>1b</b>                                                                          | <b>2a</b>                                                                          | <b>2a</b> ·150 K                                                                    |
|----------------------------------------------------------------------------------|------------------------------------------------------------------------------------|------------------------------------------------------------------------------------|------------------------------------------------------------------------------------|-------------------------------------------------------------------------------------|
| formula                                                                          | C <sub>30</sub> H <sub>32</sub> N <sub>6</sub> O <sub>4</sub> Cl <sub>6</sub> FeRe | C <sub>30</sub> H <sub>32</sub> N <sub>6</sub> O <sub>4</sub> Br <sub>6</sub> FeRe | C <sub>34</sub> H <sub>38</sub> N <sub>8</sub> O <sub>4</sub> Cl <sub>6</sub> CoRe | C <sub>38</sub> H <sub>44</sub> N <sub>10</sub> O <sub>4</sub> Cl <sub>6</sub> CoRe |
| <i>M<sub>r</sub></i>                                                             | 995.38                                                                             | 1262.12                                                                            | 1080.55                                                                            | 1162.66                                                                             |
| cryst. syst.                                                                     | triclinic                                                                          | triclinic                                                                          | triclinic                                                                          | monoclinic                                                                          |
| space group                                                                      | <i>P</i> $\bar{1}$                                                                 | <i>P</i> $\bar{1}$                                                                 | <i>P</i> $\bar{1}$                                                                 | <i>P</i> 2 <sub>1</sub> / <i>c</i>                                                  |
| <i>a</i> /Å                                                                      | 7.9831(3)                                                                          | 8.0539(4)                                                                          | 8.09457(16)                                                                        | 13.5159(6)                                                                          |
| <i>b</i> /Å                                                                      | 10.5052(5)                                                                         | 10.6650(6)                                                                         | 10.9775(2)                                                                         | 11.1140(4)                                                                          |
| <i>c</i> /Å                                                                      | 10.7890(4)                                                                         | 11.0535(7)                                                                         | 11.5719(3)                                                                         | 15.7455(8)                                                                          |
| $\alpha$ /deg                                                                    | 106.255(4)                                                                         | 105.576(5)                                                                         | 80.2539(19)                                                                        | 90                                                                                  |
| $\beta$ /deg                                                                     | 103.909(3)                                                                         | 101.890(5)                                                                         | 78.1007(19)                                                                        | 110.854(5)                                                                          |
| $\gamma$ /deg                                                                    | 92.852(3)                                                                          | 93.681(4)                                                                          | 88.8645(16)                                                                        | 90                                                                                  |
| <i>V</i> /Å <sup>3</sup>                                                         | 836.49(6)                                                                          | 887.72(9)                                                                          | 991.53(4)                                                                          | 2210.29(18)                                                                         |
| <i>T</i> /K                                                                      | 120.01(10)                                                                         | 120.01(10)                                                                         | 120.01(10)                                                                         | 149.94(13)                                                                          |
| <i>Z</i>                                                                         | 1                                                                                  | 1                                                                                  | 1                                                                                  | 2                                                                                   |
| $\rho_{\text{calcd}}$ /g cm <sup>-3</sup>                                        | 1.976                                                                              | 2.361                                                                              | 1.810                                                                              | 1.747                                                                               |
| $\lambda^3$ /Å                                                                   | 0.71073                                                                            | 0.71073                                                                            | 0.71073                                                                            | 0.71073                                                                             |
| no. of indep rflns                                                               | 3822                                                                               | 4460                                                                               | 10126                                                                              | 5419                                                                                |
| no. of params                                                                    | 232                                                                                | 222                                                                                | 260                                                                                | 278                                                                                 |
| no. of restraints                                                                | 0                                                                                  | 0                                                                                  | 0                                                                                  | 18                                                                                  |
| final <i>R</i> 1, <i>wR</i> 2 <sup>b</sup> ( <i>I</i> > 2 $\sigma$ ( <i>I</i> )) | 0.0335, 0.0560                                                                     | 0.0493, 0.0815                                                                     | 0.0222, 0.0453                                                                     | 0.0704, 0.1250                                                                      |
| <i>R</i> 1, <i>wR</i> 2 <sup>b</sup> (all data)                                  | 0.0378, 0.0575                                                                     | 0.0666, 0.0875                                                                     | 0.0231, 0.0459                                                                     | 0.0931, 0.1311                                                                      |
| goodness of fit                                                                  | 1.045                                                                              | 1.069                                                                              | 1.032                                                                              | 1.292                                                                               |
| largest residuals/e Å <sup>-3</sup>                                              | 1.14/-0.77                                                                         | 2.01/-1.89                                                                         | 0.77/-0.73                                                                         | 2.29/-0.88                                                                          |

<sup>a</sup> Graphite monochromators. <sup>b</sup>  $R1 = \sum |F_o| - |F_c| / \sum |F_o|$ ,  $wR2 = \{\sum [w(F_o^2 - \sum F_c^2)^2] / \sum [w(F_o^2)]\}^{1/2}$ .

**Table S2.** Crystallographic data for **2a**·200 K, **2a**·250 K and **2b**.

| Parameters                                                                       | <b>2a</b> ·200 K                                                                    | <b>2a</b> ·250 K                                                                    | <b>2b</b>                                                                          |
|----------------------------------------------------------------------------------|-------------------------------------------------------------------------------------|-------------------------------------------------------------------------------------|------------------------------------------------------------------------------------|
| formula                                                                          | C <sub>38</sub> H <sub>44</sub> N <sub>10</sub> O <sub>4</sub> Cl <sub>6</sub> CoRe | C <sub>38</sub> H <sub>44</sub> N <sub>10</sub> O <sub>4</sub> Cl <sub>6</sub> CoRe | C <sub>30</sub> H <sub>32</sub> N <sub>6</sub> O <sub>4</sub> Br <sub>6</sub> CoRe |
| <i>M<sub>r</sub></i>                                                             | 1162.66                                                                             | 1162.66                                                                             | 1265.20                                                                            |
| cryst. syst.                                                                     | monoclinic                                                                          | monoclinic                                                                          | triclinic                                                                          |
| space group                                                                      | <i>P</i> 2 <sub>1</sub> / <i>c</i>                                                  | <i>P</i> 2 <sub>1</sub> / <i>c</i>                                                  | <i>P</i> $\bar{1}$                                                                 |
| <i>a</i> /Å                                                                      | 13.5101(6)                                                                          | 13.4707(5)                                                                          | 8.1009(3)                                                                          |
| <i>b</i> /Å                                                                      | 11.2475(4)                                                                          | 11.3978(3)                                                                          | 10.7229(3)                                                                         |
| <i>c</i> /Å                                                                      | 15.7037(7)                                                                          | 15.6234(6)                                                                          | 10.9708(3)                                                                         |
| $\alpha$ /deg                                                                    | 90                                                                                  | 90                                                                                  | 106.156(3)                                                                         |
| $\beta$ /deg                                                                     | 110.536(5)                                                                          | 110.044(4)                                                                          | 101.328(3)                                                                         |
| $\gamma$ /deg                                                                    | 90                                                                                  | 90                                                                                  | 93.673(3)                                                                          |
| <i>V</i> /Å <sup>3</sup>                                                         | 2234.61(17)                                                                         | 2253.47(14)                                                                         | 890.36(5)                                                                          |
| <i>T</i> /K                                                                      | 199.94(13)                                                                          | 250.00(10)                                                                          | 120.01(10)                                                                         |
| <i>Z</i>                                                                         | 2                                                                                   | 2                                                                                   | 1                                                                                  |
| $\rho_{\text{calcd}}$ /g cm <sup>-3</sup>                                        | 1.728                                                                               | 1.713                                                                               | 2.360                                                                              |
| $\lambda^3$ /Å                                                                   | 0.71073                                                                             | 0.71073                                                                             | 1.54184                                                                            |
| no. of indep rflns                                                               | 5470                                                                                | 5538                                                                                | 3700                                                                               |
| no. of params                                                                    | 278                                                                                 | 278                                                                                 | 222                                                                                |
| no. of restraints                                                                | 18                                                                                  | 18                                                                                  | 0                                                                                  |
| final <i>R</i> 1, <i>wR</i> 2 <sup>b</sup> ( <i>I</i> > 2 $\sigma$ ( <i>I</i> )) | 0.0712, 0.1217                                                                      | 0.0482, 0.1044                                                                      | 0.0423, 0.1073                                                                     |
| <i>R</i> 1, <i>wR</i> 2 <sup>b</sup> (all data)                                  | 0.0985, 0.1290                                                                      | 0.0742, 0.1131                                                                      | 0.0445, 0.1101                                                                     |
| goodness of fit                                                                  | 1.278                                                                               | 1.115                                                                               | 1.052                                                                              |
| largest residuals/e Å <sup>-3</sup>                                              | 2.20/-0.85                                                                          | 0.92/-0.72                                                                          | 1.31/-1.77                                                                         |

<sup>a</sup> Graphite monochromators. <sup>b</sup>  $R1 = \sum ||F_o| - |F_c|| / \sum |F_o|$ ,  $wR2 = \{\sum[w(F_o^2 - F_c^2)^2] / \sum[w(F_o^2)]\}^{1/2}$ .

**Table S3.** Crystallographic data for **3a**, **3b**, **4a** and **4b**.

| Parameters                                                       | <b>3a</b>                                                                          | <b>3b</b>                                                                          | <b>4a</b>                                                                           | <b>4b</b>                                                                          |
|------------------------------------------------------------------|------------------------------------------------------------------------------------|------------------------------------------------------------------------------------|-------------------------------------------------------------------------------------|------------------------------------------------------------------------------------|
| formula                                                          | C <sub>23</sub> H <sub>28</sub> N <sub>7</sub> O <sub>2</sub> Cl <sub>6</sub> NiRe | C <sub>27</sub> H <sub>34</sub> N <sub>9</sub> O <sub>2</sub> Br <sub>6</sub> NiRe | C <sub>30</sub> H <sub>32</sub> CN <sub>6</sub> O <sub>4</sub> Cl <sub>6</sub> CuRe | C <sub>30</sub> H <sub>32</sub> N <sub>6</sub> O <sub>4</sub> Br <sub>6</sub> CuRe |
| <i>M<sub>r</sub></i>                                             | 892.13                                                                             | 1241.00                                                                            | 1003.05                                                                             | 1269.81                                                                            |
| cryst. syst.                                                     | orthorhombic                                                                       | monoclinic                                                                         | triclinic                                                                           | triclinic                                                                          |
| space group                                                      | <i>Pbca</i>                                                                        | <i>P2<sub>1</sub>/c</i>                                                            | <i>P</i> $\bar{1}$                                                                  | <i>P</i> $\bar{1}$                                                                 |
| <i>a</i> /Å                                                      | 16.0287(5)                                                                         | 11.3999(4)                                                                         | 8.0389(2)                                                                           | 8.07321(20)                                                                        |
| <i>b</i> /Å                                                      | 18.8615(4)                                                                         | 23.9868(8)                                                                         | 10.6038(3)                                                                          | 10.8110(4)                                                                         |
| <i>c</i> /Å                                                      | 22.0793(5)                                                                         | 14.3655(6)                                                                         | 10.8240(3)                                                                          | 11.0629(4)                                                                         |
| $\alpha$ /deg                                                    | 90                                                                                 | 90                                                                                 | 107.565(3)                                                                          | 107.144(3)                                                                         |
| $\beta$ /deg                                                     | 90                                                                                 | 91.166(3)                                                                          | 102.333(2)                                                                          | 100.370(2)                                                                         |
| $\gamma$ /deg                                                    | 90                                                                                 | 90                                                                                 | 93.278(2)                                                                           | 93.917(2)                                                                          |
| <i>V</i> /Å <sup>3</sup>                                         | 6675.1(3)                                                                          | 3927.4(3)                                                                          | 851.99(5)                                                                           | 899.99(5)                                                                          |
| <i>T</i> /K                                                      | 120.01(10)                                                                         | 120.01(10)                                                                         | 120.01(10)                                                                          | 120.01(10)                                                                         |
| <i>Z</i>                                                         | 8                                                                                  | 4                                                                                  | 1                                                                                   | 1                                                                                  |
| $\rho_{\text{calcd}}$ /g cm <sup>-3</sup>                        | 1.775                                                                              | 2.099                                                                              | 1.955                                                                               | 2.343                                                                              |
| $\lambda^3$ /Å                                                   | 0.71073                                                                            | 0.71073                                                                            | 1.54184                                                                             | 0.71073                                                                            |
| no. of indep rflns                                               | 6101                                                                               | 9632                                                                               | 3525                                                                                | 5554                                                                               |
| no. of params                                                    | 367                                                                                | 423                                                                                | 243                                                                                 | 222                                                                                |
| no. of restraints                                                | 0                                                                                  | 0                                                                                  | 0                                                                                   | 0                                                                                  |
| final R1, wR2 <sup>b</sup> ( <i>I</i> > 2 $\sigma$ ( <i>I</i> )) | 0.0504, 0.0720                                                                     | 0.0407, 0.0739                                                                     | 0.0195, 0.0499                                                                      | 0.0537, 0.1277                                                                     |
| R1, wR2 <sup>b</sup> (all data)                                  | 0.0667, 0.0764                                                                     | 0.0795, 0.0783                                                                     | 0.0197, 0.0500                                                                      | 0.0681, 0.1379                                                                     |
| goodness of fit                                                  | 1.208                                                                              | 0.922                                                                              | 1.040                                                                               | 1.025                                                                              |
| largest residuals/e Å <sup>-3</sup>                              | 0.80/-0.67                                                                         | 2.693/-1.596                                                                       | 0.97/-1.10                                                                          | 3.10/-3.42                                                                         |

<sup>a</sup> Graphite monochromators. <sup>b</sup>  $R1 = \sum |F_o| - |F_c| / \sum |F_o|$ ,  $wR2 = \{\sum [w(F_o^2 - F_c^2)^2] / \sum [w(F_o^2)]\}^{1/2}$ .

**Table S4.** Selected bond lengths (Å) and angles (°) for **1a**, **1b**, **2a**, **2a**·150 K, **2a**·200 K, **2a**·250 K.

|                      | <b>1a</b> (M = Fe) | <b>1b</b> (M = Fe) | <b>2a</b> (M = Co) | <b>2a</b> ·150 K | <b>2a</b> ·200 K | <b>2a</b> ·250 K |
|----------------------|--------------------|--------------------|--------------------|------------------|------------------|------------------|
| Re(1)–Cl(1)          | 2.3602(9)          | -                  | 2.3590(3)          | 2.3631(17)       | 2.3639(18)       | 2.3642(14)       |
| Re(1)–Cl(2)          | 2.3748(9)          | -                  | 2.3714(3)          | 2.3585(17)       | 2.3441(19)       | 2.3435(13)       |
| Re(1)–Cl(3)          | 2.3547(8)          | -                  | 2.3676(3)          | 2.3427(19)       | 2.3586(17)       | 2.3587(15)       |
| Re(1)–Br(1)          | -                  | 2.5132(6)          | -                  | -                | -                | -                |
| Re(1)–Br(2)          | -                  | 2.5029(6)          | -                  | -                | -                | -                |
| Re(1)–Br(3)          | -                  | 2.5249(6)          | -                  | -                | -                | -                |
| M(1)–O(1)            | 1.872(2)           | 1.873(4)           | 1.9103(10)         | 2.144(5)         | 2.121(5)         | 2.093(4)         |
| M(1)–N(1)            | 1.984(3)           | 1.963(5)           | 1.9251(11)         | 1.978(6)         | 1.997(6)         | 2.031(4)         |
| M(1)–N(2)            | 1.967(3)           | 1.991(5)           | 1.9556(10)         | 1.963(6)         | 2.018(6)         | 2.049(4)         |
| O(1)–N(3)            | 1.323(3)           | 1.316(6)           | 1.3137(16)         | 1.290(8)         | 1.295(8)         | 1.305(5)         |
| N(3)–C(11)           | 1.478(5)           | 1.472(7)           | 1.4786(18)         | 1.466(9)         | 1.462(9)         | 1.467(7)         |
| N(3)–C(13)           | 1.486(5)           | 1.499(7)           | 1.471(2)           | 1.484(9)         | 1.470(9)         | 1.466(7)         |
| C(11)–O(2)           | 1.385(4)           | 1.396(7)           | 1.3973(16)         | 1.412(9)         | 1.406(8)         | 1.405(6)         |
| O(2)–C(12)           | 1.443(12)          | 1.456(7)           | 1.4535(18)         | 1.431(10)        | 1.415(10)        | 1.414(8)         |
| C(12)–C(13)          | 1.547(14)          | 1.530(9)           | 1.528(2)           | 1.549(12)        | 1.560(13)        | 1.529(10)        |
| C(13)–C(14)          | 1.513(6)           | 1.504(8)           | 1.520(2)           | 1.508(13)        | 1.522(14)        | 1.511(11)        |
| C(13)–C(15)          | 1.508(6)           | 1.536(8)           | 1.519(2)           | 1.521(12)        | 1.505(14)        | 1.499(11)        |
| Cl(1)–Re(1)–Cl(2)    | 89.74(3)           | -                  | 89.513(13)         | 90.15(6)         | 89.91(10)        | 90.18(6)         |
| Cl(1)–Re(1)–Cl(3)    | 90.18(3)           | -                  | 90.909(13)         | 89.87(8)         | 89.78(6)         | 89.78(5)         |
| Cl(2)–Re(1)–Cl(3)    | 89.73(3)           | -                  | 89.184(12)         | 90.34(9)         | 89.64(10)        | 89.40(7)         |
| Br(1)–Re(1)–Br(2)    | -                  | 90.38(2)           | -                  | -                | -                | -                |
| Br(1)–Re(1)–Br(3)    | -                  | 90.19(2)           | -                  | -                | -                | -                |
| Br(2)–Re(1)–Br(3)    | -                  | 89.79(2)           | -                  | -                | -                | -                |
| M(1)–O(1)–N(3)       | 118.31(19)         | 117.9(3)           | 113.99(9)          | 113.5(4)         | 114.5(4)         | 115.1(3)         |
| M(1)–O(1)–N(3)–C(11) | 13.8(3)            | -14.9(5)           | -29.26(11)         | 5.0(5)           | -3.7(5)          | -2.4(6)          |
| M(1)–O(1)–N(3)–C(13) | 155.3(2)           | -157.3(4)          | -168.87(10)        | 168.6(5)         | -169.5(5)        | -170.8(4)        |

**Table S5.** Selected bond lengths (Å) and angles (°) for **2b**.

| <b>2b</b>            |            |
|----------------------|------------|
| Re(1)–Br(1)          | 2.5107(5)  |
| Re(1)–Br(2)          | 2.5226(5)  |
| Re(1)–Br(3)          | 2.5049(5)  |
| Co(1)–O(1)           | 2.092(4)   |
| Co(1)–N(1)           | 1.963(4)   |
| Co(1)–N(2)           | 1.975(4)   |
| O(1)–N(3)            | 1.269(6)   |
| N(3)–C(11)           | 1.485(7)   |
| N(3)–C(13)           | 1.493(7)   |
| C(11)–O(2)           | 1.399(6)   |
| O(2)–C(12)           | 1.412(8)   |
| C(12)–C(13)          | 1.539(9)   |
| C(13)–C(14)          | 1.525(8)   |
| C(13)–C(15)          | 1.518(9)   |
| Br(1)–Re(1)–Br(2)    | 90.148(17) |
| Br(1)–Re(1)–Br(3)    | 90.211(17) |
| Br(2)–Re(1)–Br(3)    | 89.856(18) |
| M(1)–O(1)–N(3)       | 113.9(3)   |
| M(1)–O(1)–N(3)–C(11) | -5.9(4)    |
| M(1)–O(1)–N(3)–C(13) | -157.1(4)  |

**Table S6.** Selected bond lengths (Å) and angles (°) for **3a** and **3b**.

| <b>3a</b>             |            | <b>3b</b>             |           |
|-----------------------|------------|-----------------------|-----------|
| Re1–Cl(1)             | 2.3585(15) | Re1–Br(1)             | 2.5087(5) |
| Re1–Cl(2)             | 2.3616(13) | Re1–Br(2)             | 2.5124(6) |
| Re1–Cl(3)             | 2.3546(15) | Re1–Br(3)             | 2.5072(5) |
| Re1–Cl(4)             | 2.3630(13) | Re1–Br(4)             | 2.5147(7) |
| Re1–Cl(5)             | 2.3606(16) | Re1–Br(5)             | 2.5008(6) |
| Re1–Cl(6)             | 2.3603(15) | Re1–Br(6)             | 2.5208(6) |
|                       |            |                       |           |
| Ni(1)–O(1)            | 2.073(4)   | Ni(1)–O(1)            | 2.090(4)  |
| Ni(1)–N(1)            | 2.068(4)   | Ni(1)–N(1)            | 2.083(4)  |
| Ni(1)–N(2)            | 2.059(4)   | Ni(1)–N(2)            | 2.076(4)  |
| Ni(1)–N(4)            | 2.071(5)   | Ni(1)–N(4)            | 2.051(4)  |
| Ni(1)–N(5)            | 2.058(5)   | Ni(1)–N(5)            | 2.079(4)  |
| Ni(1)–N(6)            | 2.037(5)   | Ni(1)–N(6)            | 2.047(5)  |
|                       |            |                       |           |
| O(1)–N(3)             | 1.271(6)   | O(1)–N(3)             | 1.274(6)  |
| N(3)–C(11)            | 1.496(7)   | N(3)–C(11)            | 1.497(7)  |
| N(3)–C(13)            | 1.481(7)   | N(3)–C(13)            | 1.467(7)  |
| C(11)–O(2)            | 1.403(6)   | C(11)–O(2)            | 1.386(7)  |
| O(2)–C(12)            | 1.452(7)   | O(2)–C(12)            | 1.460(7)  |
| C(12)–C(13)           | 1.527(8)   | C(12)–C(13)           | 1.512(8)  |
| C(13)–C(14)           | 1.523(8)   | C(13)–C(14)           | 1.530(7)  |
| C(13)–C(15)           | 1.509(8)   | C(13)–C(15)           | 1.529(7)  |
|                       |            |                       |           |
| Ni(1)–O(1)–N(3)       | 115.3(3)   | Ni(1)–O(1)–N(3)       | 115.1(3)  |
| Ni(1)–O(1)–N(3)–C(11) | -4.186     | Ni(1)–O(1)–N(3)–C(11) | 3.491     |
| Ni(1)–O(1)–N(3)–C(13) | -172.213   | Ni(1)–O(1)–N(3)–C(13) | -173.417  |

**Table S7.** Selected bond lengths (Å) and angles (°) for **4a** and **4b**.

|                       | <b>4a</b>   | <b>4b</b> |
|-----------------------|-------------|-----------|
| Re(1)–Cl(1)           | 2.3578(5)   | -         |
| Re(1)–Cl(2)           | 2.3727(5)   | -         |
| Re(1)–Cl(3)           | 2.3583(5)   | -         |
| Re(1)–Br(1)           | -           | 2.5103(6) |
| Re(1)–Br(2)           | -           | 2.5082(6) |
| Re(1)–Br(3)           | -           | 2.5224(6) |
| Cu(1)–O(1)            | 2.3021(16)  | 2.321(5)  |
| Cu(1)–N(1)            | 2.0135(18)  | 2.017(5)  |
| Cu(1)–N(2)            | 2.0116(18)  | 2.014(5)  |
| O(1)–N(3)             | 1.270(3)    | 1.266(7)  |
| N(3)–C(11)            | 1.491(3)    | 1.487(8)  |
| N(3)–C(13)            | 1.485(3)    | 1.487(8)  |
| C(11)–O(2)            | 1.392(3)    | 1.400(8)  |
| O(2)–C(12)            | 1.463(6)    | 1.414(9)  |
| C(12)–C(13)           | 1.492(6)    | 1.536(11) |
| C(13)–C(14)           | 1.433(8)    | 1.524(11) |
| C(13)–C(15)           | 1.506(3)    | 1.513(10) |
| Cl(1)–Re(1)–Cl(2)     | 90.96(2)    | -         |
| Cl(1)–Re(1)–Cl(3)     | 90.135(18)  | -         |
| Cl(2)–Re(1)–Cl(3)     | 89.799(19)  | -         |
| Br(1)–Re(1)–Br(2)     | -           | 90.08(2)  |
| Br(1)–Re(1)–Br(3)     | -           | 90.52(2)  |
| Br(2)–Re(1)–Br(3)     | -           | 89.85(2)  |
| Cu(1)–O(1)–N(3)       | 110.96(13)  | 110.6(4)  |
| Cu(1)–O(1)–N(3)–C(11) | 0.67(16)    | -2.0(5)   |
| Cu(1)–O(1)–N(3)–C(13) | -155.94(14) | -160.5(4) |



**Table S8.** Intermolecular distances (Å) and angles (°) found in all complexes. CH $\cdots\pi$  angles ( $\theta$ ) are taken from angle between the plane of the ring and the C-H bond while CH $\cdots\pi$  distances (d) are from the carbon of the CH moiety to the centroid of the ring.

| Complex        | CH $\cdots\pi$ |       | Cl $\cdots\pi$ | Br $\cdots\pi$ | Br $\cdots$ O | Cl $\cdots$ Cl | Br $\cdots$ Br |
|----------------|----------------|-------|----------------|----------------|---------------|----------------|----------------|
|                | $\theta$ (°)   | d (Å) | d (Å)          | d (Å)          | d (Å)         | d (Å)          | d (Å)          |
| <b>1a</b>      | 111.6          | 3.495 | 3.688          | -              | -             | 4.708          | -              |
|                | 133.1          | 3.759 | -              | -              | -             | -              | -              |
| <b>1b</b>      | 131.1          | 3.681 | -              | 3.783          | -             | -              | 4.569          |
|                | 115.6          | 3.619 | -              | -              | -             | -              | -              |
| <b>2a</b>      | 127.5          | 3.912 | -              | -              | -             | 3.831          | -              |
|                | 120.9          | 3.388 | -              | -              | -             | -              | -              |
| <b>2a-150K</b> | -              | -     | -              | -              | -             | 6.455          | -              |
| <b>2a-200K</b> | -              | -     | -              | -              | -             | 6.572          | -              |
| <b>2a-250K</b> | -              | -     | -              | -              | -             | 6.715          | -              |
| <b>2b</b>      | 114.0          | 3.613 | -              | 3.791          | -             | -              | 4.615          |
|                | 134.9          | 3.703 | -              | -              | -             | -              | -              |
| <b>3a</b>      | 123.0          | 3.786 | -              | -              | -             | 4.548          | -              |
|                | 114.2          | 3.575 | -              | -              | -             | -              | -              |
| <b>3b</b>      | 129.2          | 3.812 | -              | -              | -             | -              | 3.907          |
|                | 124.5          | 3.485 | -              | -              | -             | -              | -              |
| <b>4a</b>      | 134.5          | 3.839 | 3.645          | -              | -             | 4.770          | -              |
|                | 108.1          | 3.504 | -              | -              | -             | -              | -              |
| <b>4b</b>      | 128.1          | 3.702 | -              | 3.714          | -             | -              | 4.578          |
|                | 112.8          | 3.608 | -              | -              | -             | -              | -              |

## Electronic Supporting Information (ESI)

**Table S9.** Selected bond lengths (Å) for **2a**, **2a**·150 K, **2a**·200 K, **2a**·250 K, **2b**, [Co<sup>II</sup>(L<sup>•</sup>)<sub>2</sub>](NO<sub>3</sub>)<sub>2</sub> (**A**),<sup>1</sup> [Co<sup>III</sup>(L<sup>-</sup>)<sub>2</sub>](BPh<sub>4</sub>) (**B**),<sup>1</sup> [Co<sup>II</sup>(L<sup>•</sup>)<sub>2</sub>](B(C<sub>6</sub>F<sub>5</sub>)<sub>4</sub>)<sub>2</sub>·CH<sub>2</sub>Cl<sub>2</sub> (**C**)<sup>2</sup> and [Co<sup>II</sup>(L<sup>•</sup>)<sub>2</sub>](B(C<sub>6</sub>F<sub>5</sub>)<sub>4</sub>)<sub>2</sub>·2Et<sub>2</sub>O (**D**)<sup>2</sup> at temperatures shown. Low-spin (LS), high spin (HS), neutral radical (L<sup>•</sup>) and hydroxylamino anionic (L<sup>-</sup>) assigned forms of the cobalt ion and the ligand are shown in the table below. See Fig. S1 for labelling of atoms.

|               | <b>2a</b>      | <b>2a</b> ·150 K | <b>2a</b> ·200 K | <b>2a</b> ·250 K | <b>2b</b>      |                 |                 |                 |
|---------------|----------------|------------------|------------------|------------------|----------------|-----------------|-----------------|-----------------|
| Co spin state | LS Co(II)      | LS Co(II)        | LS/HS            | LS/HS            | LS Co(II)      |                 |                 |                 |
| Co(1)-O(1)    | 1.9103(10)     | 2.144(5)         | 2.121(5)         | 2.093(4)         | 2.092(4)       |                 |                 |                 |
| Co(1)-N(1)    | 1.9556(10)     | 1.978(6)         | 1.997(6)         | 2.031(4)         | 1.963(4)       |                 |                 |                 |
| Co(1)-N(2)    | 1.9251(11)     | 1.963(6)         | 2.018(6)         | 2.049(4)         | 1.976(4)       |                 |                 |                 |
| Ligand form   | L <sup>•</sup> | L <sup>•</sup>   | L <sup>•</sup>   | L <sup>•</sup>   | L <sup>•</sup> |                 |                 |                 |
| O(1)-N(3)     | 1.3137(16)     | 1.290(8)         | 1.295(8)         | 1.305(5)         | 1.269(6)       |                 |                 |                 |
| O(3)-N(6)     | -              | -                | -                | -                | -              |                 |                 |                 |
|               | <b>A</b> ·123K | <b>A</b> ·273K   | <b>A</b> ·353K   | <b>B</b> ·123K   | <b>C</b> ·123K | <b>C</b> ·273 K | <b>D</b> ·123 K | <b>D</b> ·273 K |
| Co spin state | LS Co(II)      | LS/HS            | LS/HS            | LS Co(III)       | LS Co(II)      | HS Co(II)       | HS Co(II)       | HS Co(II)       |
| Co(1)-O(1)    | 2.113(3)       | 2.117(2)         | 2.107(3)         | 1.879(2)         | 2.117(2)       | 2.078(3)        | 2.054(2)        | 2.075(2)        |
| Co(1)-N(1)    | 1.959(3)       | 2.040(2)         | 2.056(3)         | 1.930(3)         | 1.977(2)       | 2.078(4)        | 2.114(3)        | 2.098(3)        |
| Co(1)-N(2)    | 1.986(3)       | 2.056(2)         | 2.073(43)        | 1.928(3)         | 1.981(2)       | 2.084(3)        | 2.116(3)        | 2.107(3)        |
| Co(1)-O(3)    | -              | -                | -                | 1.892(2)         | 2.126(2)       | 2.086(3)        | -               | -               |
| Co(1)-N(4)    | -              | -                | -                | 1.921(3)         | 1.987(2)       | 2.093(3)        | -               | -               |
| Co(1)-N(5)    | -              | -                | -                | 1.916(3)         | 1.992(2)       | 2.090(3)        | -               | -               |
| Ligand form   | L <sup>•</sup> | L <sup>•</sup>   | L <sup>•</sup>   | Anionic          | L <sup>•</sup> | L <sup>•</sup>  | L <sup>•</sup>  | L <sup>•</sup>  |
| O(1)-N(3)     | 1.294(3)       | 1.285(3)         | 1.285(4)         | 1.411(3)         | 1.274(3)       | 1.275(4)        | 1.286(4)        | 1.290(3)        |
| O(3)-N(6)     | -              | -                | -                | 1.401(3)         | 1.276(3)       | 1.278(4)        | -               | -               |

**Table S10.** Summary of selected octahedral nickel salts containing three coordinated acetonitrile solvate molecules. The loss of coordinated acetonitrile is based on the microanalysis of the relevant complex.

| Formula                                                                                                                       | Loss of coordinated acetonitrile | Reference |
|-------------------------------------------------------------------------------------------------------------------------------|----------------------------------|-----------|
| $[\{\text{Ni}(\text{CH}_3\text{CN})_3\}_2\{\text{Ni}(\mu\text{-}2\text{-pyS})(\mu_3\text{-}2\text{-pyS})\}_6](\text{PF}_6)_4$ | No                               | 3         |
| $[\text{Ni}(\text{L}^1)(\text{CH}_3\text{CN})_3](\text{ClO}_4)_2 \cdot 2\text{CH}_3\text{CN}$                                 | No                               | 4         |
| $[\text{Tpm}^{\text{Me,Me}}\text{Ni}(\text{CH}_3\text{CN})_3](\text{BF}_4)_2$                                                 | Yes                              | 5         |
| $[\text{Tpm}^{\text{Ph}}\text{Ni}(\text{MeCN})_3](\text{BF}_4)_2 \cdot \text{MeCN}$                                           | No                               | 5         |
| $[\text{Ni}\{(\text{Me-Tp})_2\text{PMA}\}(\text{CH}_3\text{CN})_3](\text{ClO}_4)_2$                                           | No                               | 6         |
| $[\text{Ni}(\text{P}^{\text{tBu}}_2\text{N}^{\text{Ph}}_2)(\text{CH}_3\text{CN})_3](\text{BF}_4)_2$                           | No                               | 7         |
| $[\text{Ni}(\text{L})(\text{CH}_3\text{CN})_3](\text{ClO}_4)_2 \cdot 0.5\text{H}_2\text{O}$                                   | No                               | 8         |
| $[\text{Ni}(\text{L1})(\text{CH}_3\text{CN})_3](\text{ClO}_4)_2 \cdot 2\text{CH}_3\text{CN}$                                  | No                               | 9         |
| $[\text{Ni}(\text{L2})(\text{CH}_3\text{CN})_3](\text{ClO}_4)_2 \cdot 2\text{CH}_3\text{CN}$                                  | No                               | 9         |
| $[\text{Ni}(\text{L3})(\text{CH}_3\text{CN})_3](\text{BF}_4)_2$                                                               | No                               | 10        |
| $[\text{Ni}(\text{L4})(\text{CH}_3\text{CN})_3](\text{BF}_4)_2$                                                               | No                               | 10        |
| $[\text{Tp}^{\text{iPr}_2}\text{Ni}(\text{CH}_3\text{CN})_3]\text{OTf}$                                                       | Yes                              | 11        |
| $[\text{Tp}^{\text{Ph,Me}}\text{Ni}(\text{CH}_3\text{CN})_3]\text{OTf}$                                                       | No                               | 11        |

*Abbreviations:* pyS = 2-mercaptopyridinate;  $\text{L}^1$  =  $\text{N}_2\text{O}_2\text{S}_2$  macrocycle;  $\text{Tpm}^{\text{Me,Me}}$  = tris(3,5-dimethylpyrazol-1-yl)methane;  $\text{Tpm}^{\text{Ph}}$  = tris(3-phenylpyrazol-1-yl)methane;  $(\text{Me-Tp})_2\text{PMA}$  = bis(5-methyl-2-thiophenemethyl)(2-pyridylmethyl)amine;  $\text{P}^{\text{tBu}}_2\text{N}^{\text{Ph}}_2$  and  $\text{P}^{\text{tBu}}_2\text{N}^{\text{Bz}}_2$  = cyclic diphosphine; L = 1,4,7-tris(cyanomethyl)-1,4,7-triazacyclononane; L1 = bis(1-methylbenzimidazolyl-2-methyl)amine; L2 = bis(1-methylbenzimidazolyl-2-methyl)-10-camphorsulfonamide; L3 = 1,3,5-tribenzyl-1,3,5-triazinane; L4 = 1,3,5-tris(2-fluorobenzyl)-1,3,5-triazinane;  $\text{Tp}^{\text{R}_2}$  = hydrotrispyrazolylborato with R group shown.

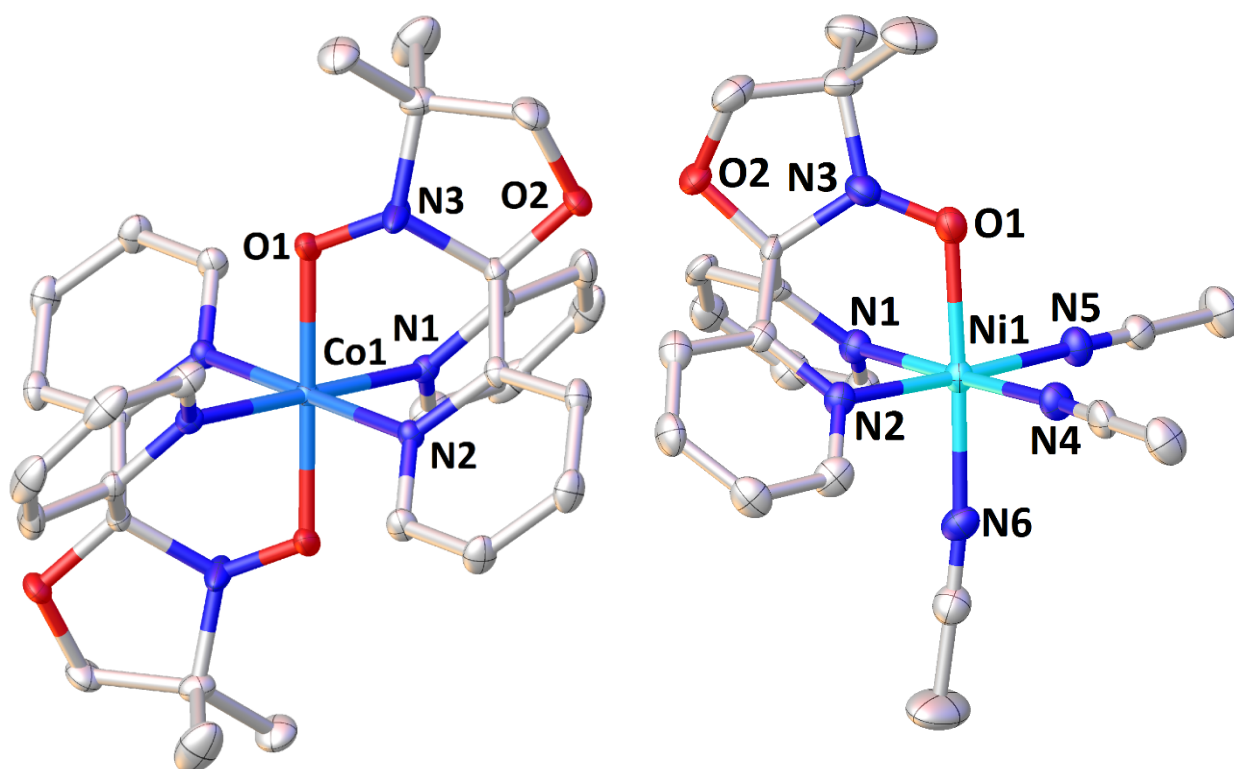

**Figure S1.** Labelled molecular structure of the  $[\text{Co}^{\text{II}}(\text{L}^*)_2]^{2+}$  (left) and  $[\text{Ni}^{\text{II}}(\text{L}^*)(\text{MeCN})_3]^{2+}$  cations. The labelling shown for the  $[\text{Co}^{\text{II}}(\text{L}^*)_2]^{2+}$  cation (left) is representative of that employed in complexes **1a**, **1b**, **2a**, **2b**, **4a** and **4b**. The labelling shown for the  $[\text{Ni}^{\text{II}}(\text{L}^*)(\text{MeCN})_3]^{2+}$  cation (right) is representative of that employed for **3a** and **3b**. Hydrogen atoms removed for clarity. Colour code: Co, light blue; Ni, cyan; N, blue; O, red; C, grey.

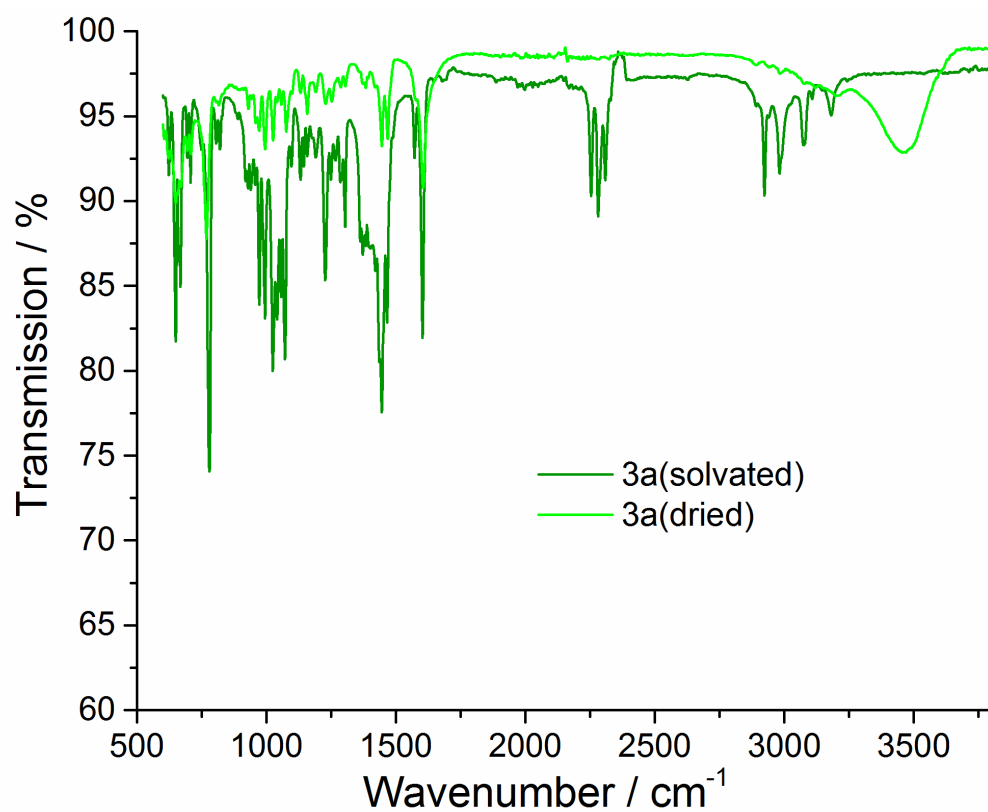

**Figure S2.** Infrared spectra of **3a(dried)** and **3a(solvated)**. In **3a(solvated)** the bands associated with both coordinated and solvated acetonitrile are clearly present (e.g. 2308, 2281 and 2253 cm<sup>-1</sup>). For **3a(dried)** the bands associated with acetonitrile disappear and bands associated with water absorption around 3400 cm<sup>-1</sup> are observed.

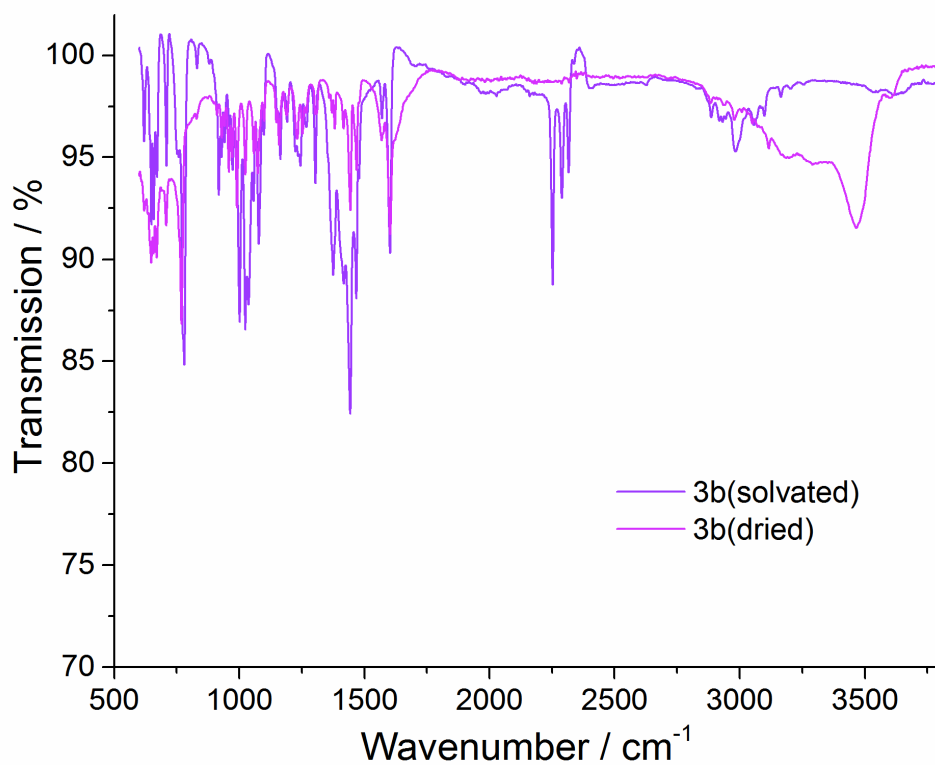

**Figure S3.** Infrared spectra of **3b(dried)** and **3b(solvated)**. In **3b(solvated)** the bands associated with both coordinated and solvated acetonitrile are clearly present (e.g. 2316, 2289 and 2253 cm<sup>-1</sup>). For **3b(dried)** the bands associated with acetonitrile disappear and bands associated with water absorption around 3400 cm<sup>-1</sup> are observed.

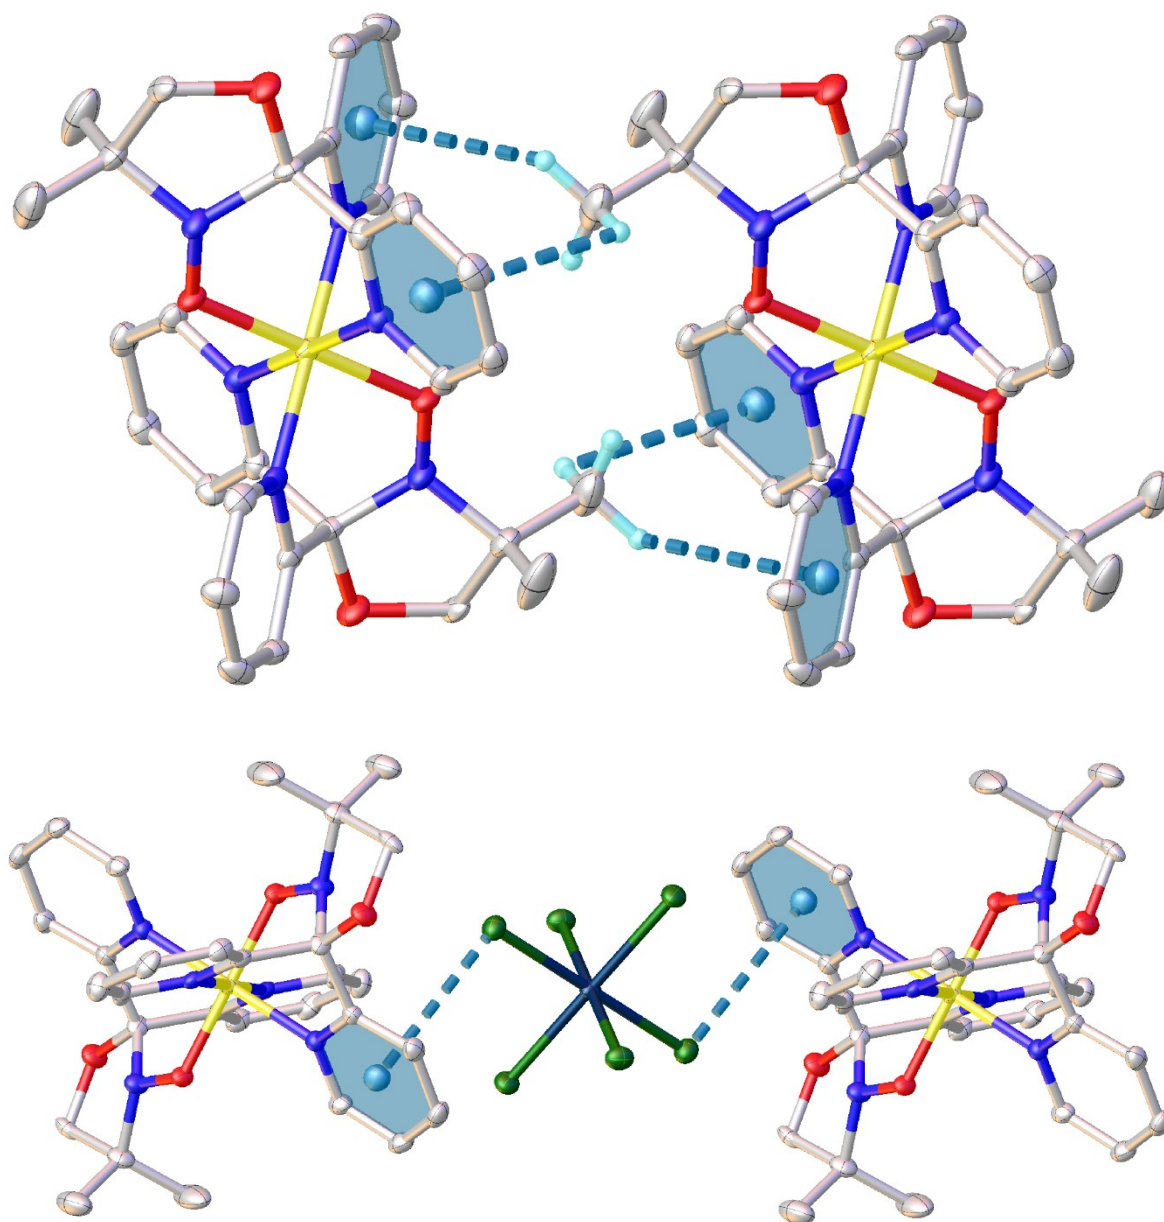

**Figure S4.** Intermolecular CH $\cdots\pi$  (top) and Cl $\cdots\pi$  (bottom) interactions for complex **1a**. Selected hydrogens and disordered second part of oxazolidine ring hidden for clarity. Colour code: Re, dark blue; Fe, yellow; Cl, dark green; N, blue; O, red; C, grey; H, cyan. Dashed lines represent the relevant intermolecular interaction.

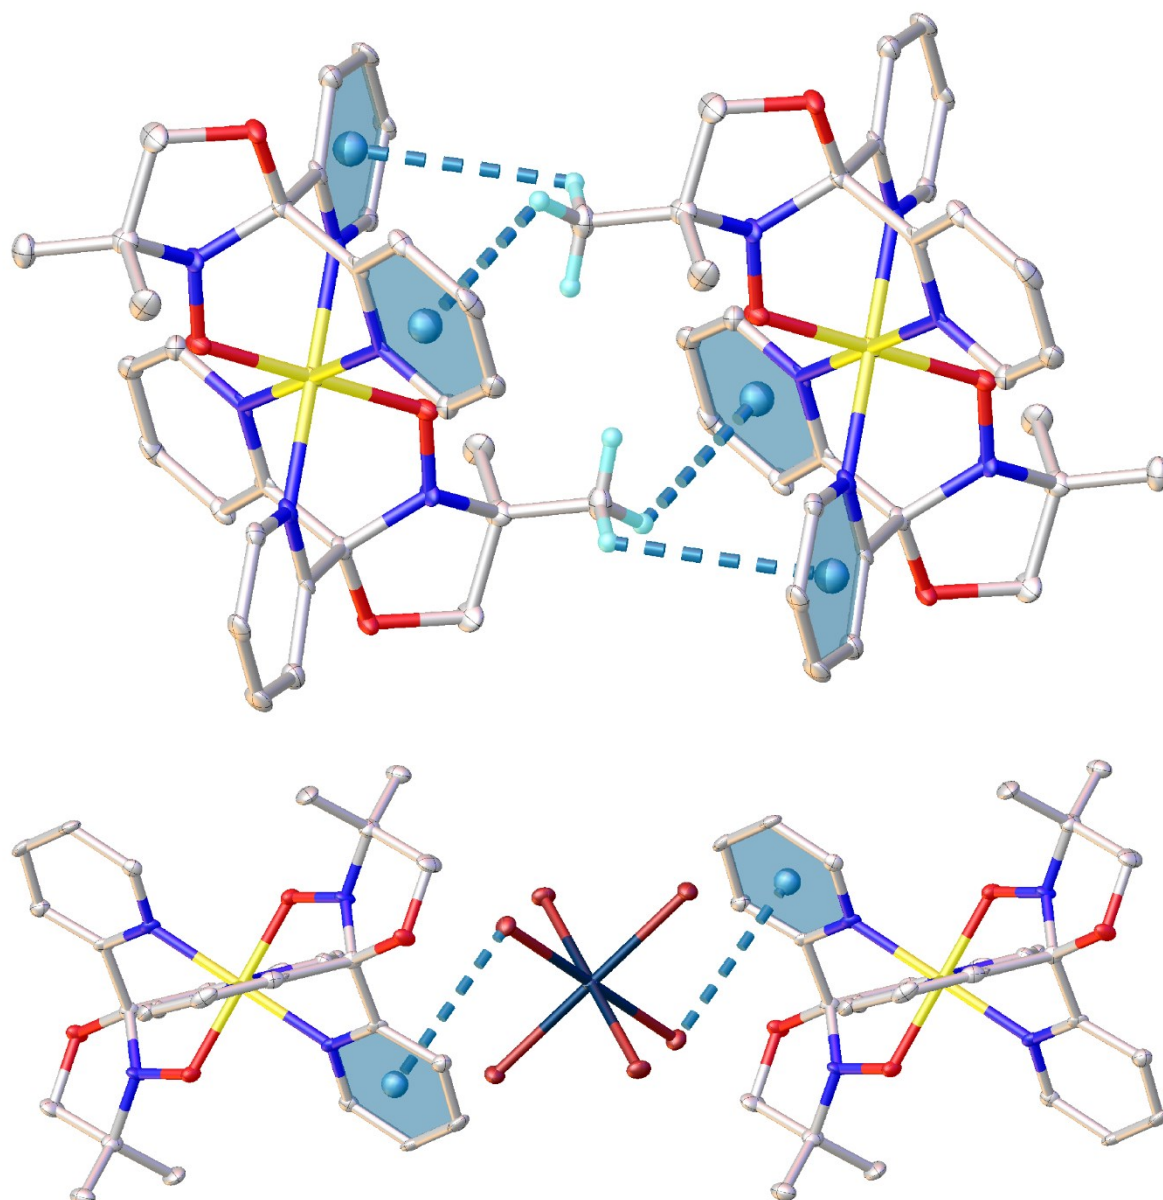

**Figure S5.** Intermolecular CH $\cdots\pi$  (top) and Br $\cdots\pi$  (bottom) interactions for complex **1b**. Selected hydrogens and disordered second part of oxazolidine ring hidden for clarity. Colour code: Re, dark blue; Fe, yellow; Br, dark red; N, blue; O, red; C, grey; H, cyan. Dashed lines represent the relevant intermolecular interaction.



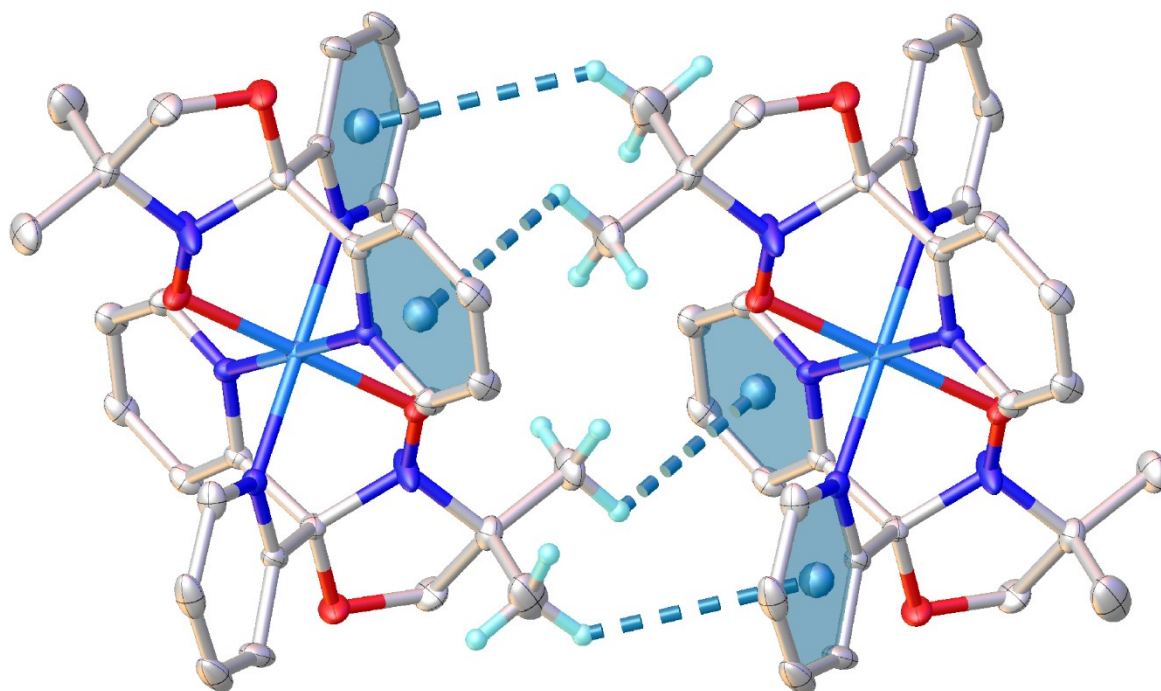

**Figure S6.** CH $\cdots\pi$  interactions for complex **2a**. Selected hydrogens and acetonitrile solvate molecule removed for clarity. Colour code: Co, light blue; N, blue; O, red; C, grey; H, cyan. Dashed lines represent the relevant intermolecular interaction.

Electronic Supporting Information (ESI)

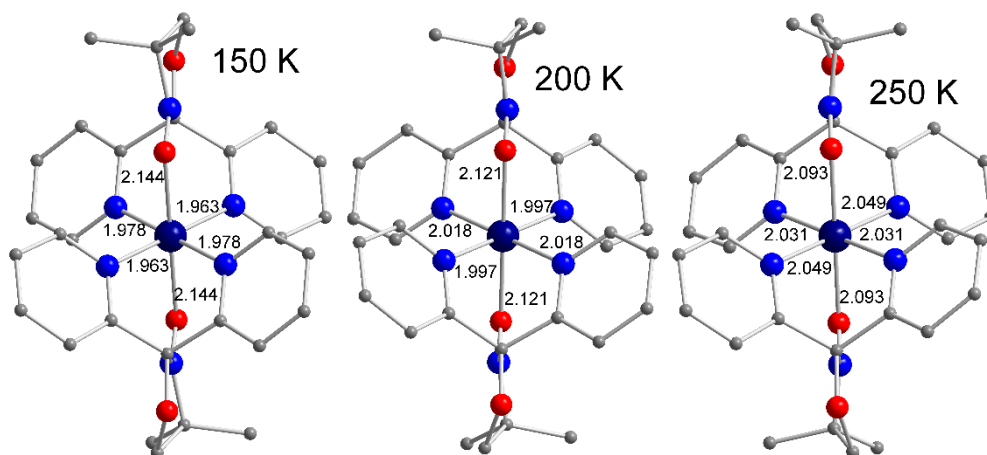

**Figure S7.** Crystal structure of the [Co<sup>II</sup>(L\*)<sub>2</sub>]<sup>2+</sup> cation at 150 (**2a**·150 K), 200 (**2a**·200 K) and 250 K (**2a**·250 K) with bond lengths (Å) indicated. Hydrogen atoms omitted for clarity. Colour code: Co, dark blue; N, blue; O, red; C, grey. Hydrogen atoms omitted for clarity.

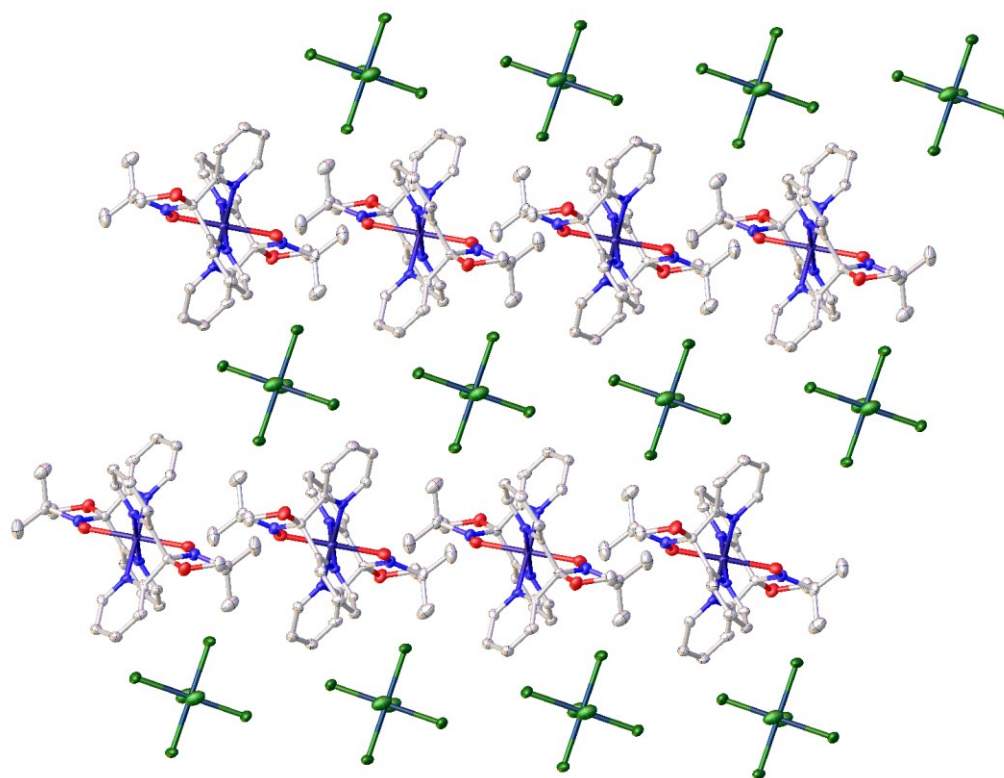

**Figure S8.** Crystal packing diagram of **2a**·150 K as viewed down the *b*-axis. This packing is representative of the packing present in **2a**·200 K and **2a**·250 K. Hydrogens atom and solvate acetonitrile molecules hidden for clarity. Colour code: Re, dark blue; Co, light blue; Cl, dark green; N, blue; O, red; C, grey.

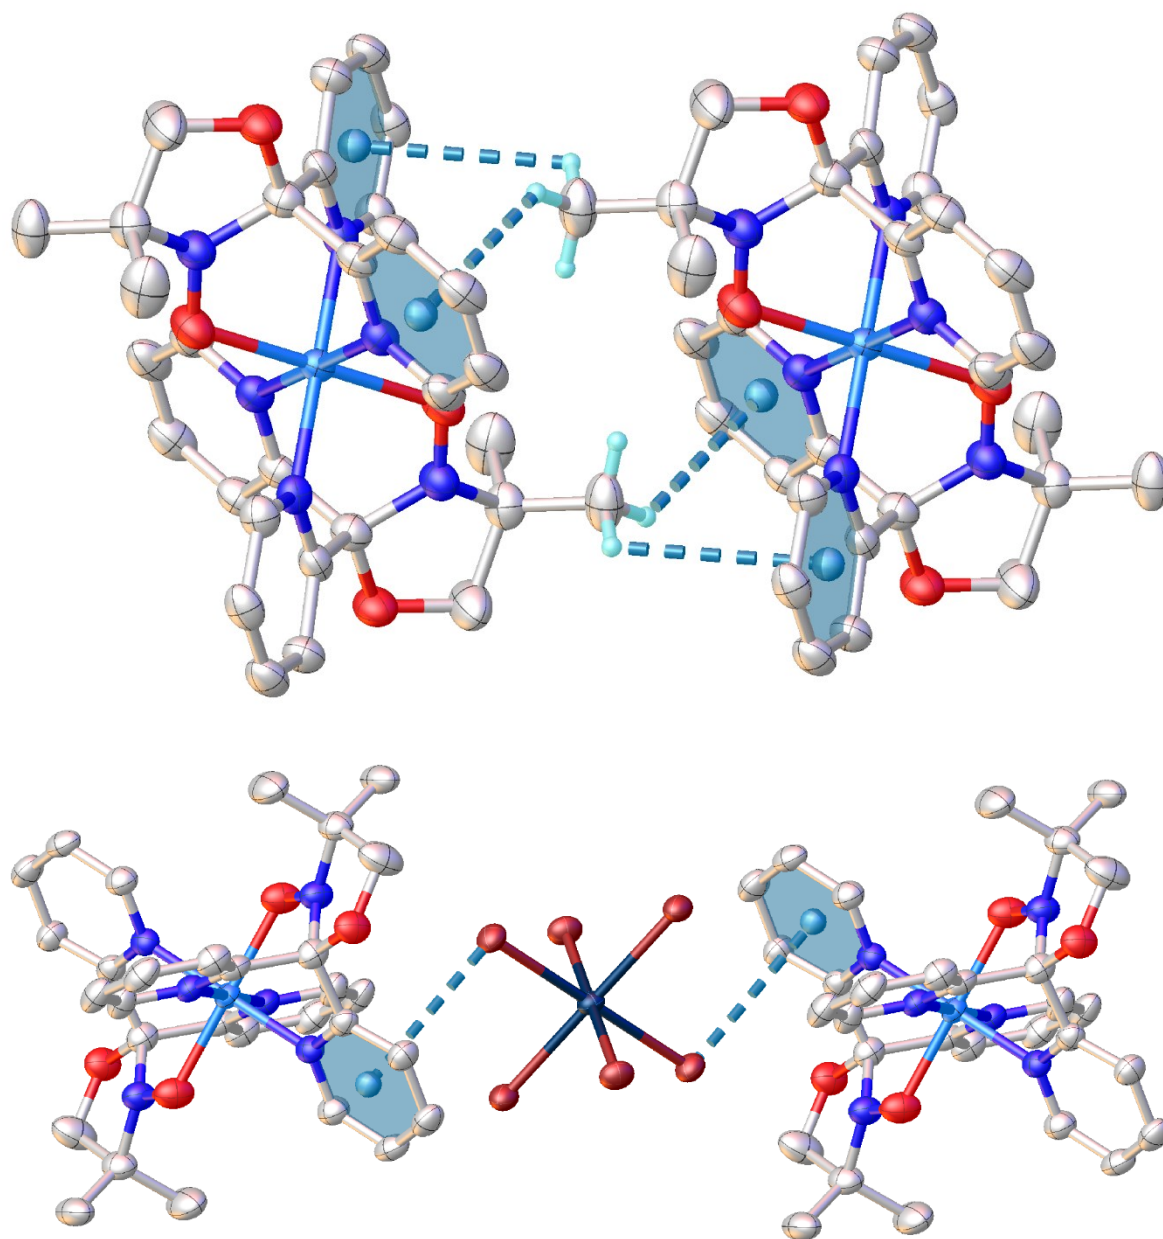

**Figure S9.** Intermolecular CH... $\pi$  (top) and Br... $\pi$  (bottom) interactions for complex **2b**. Selected hydrogens hidden for clarity. Colour code: Re, dark blue; Co, light blue; Br, dark red; N, blue; O, red; C, grey; H, cyan. Dashed lines represent the relevant intermolecular interaction.

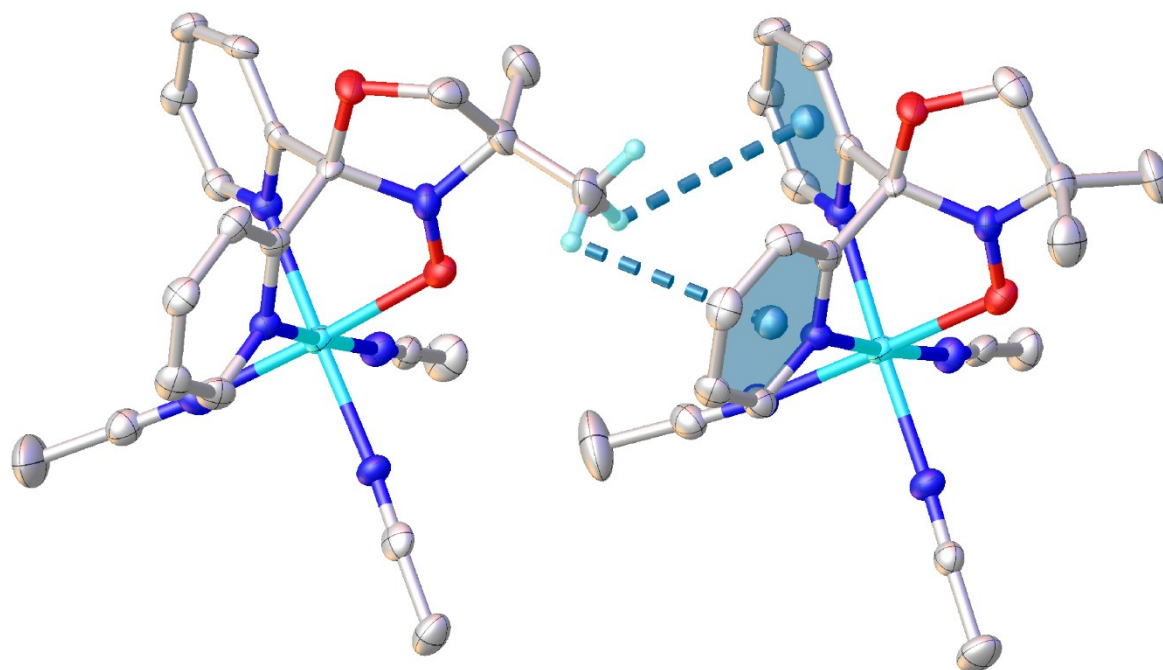

**Figure S10.** CH... $\pi$  interactions for complex **3a**. Selected hydrogens and acetonitrile solvate molecule removed for clarity. Colour code: Ni, cyan; N, blue; O, red; C, grey; H, cyan. Dashed lines represent the relevant intermolecular interaction.

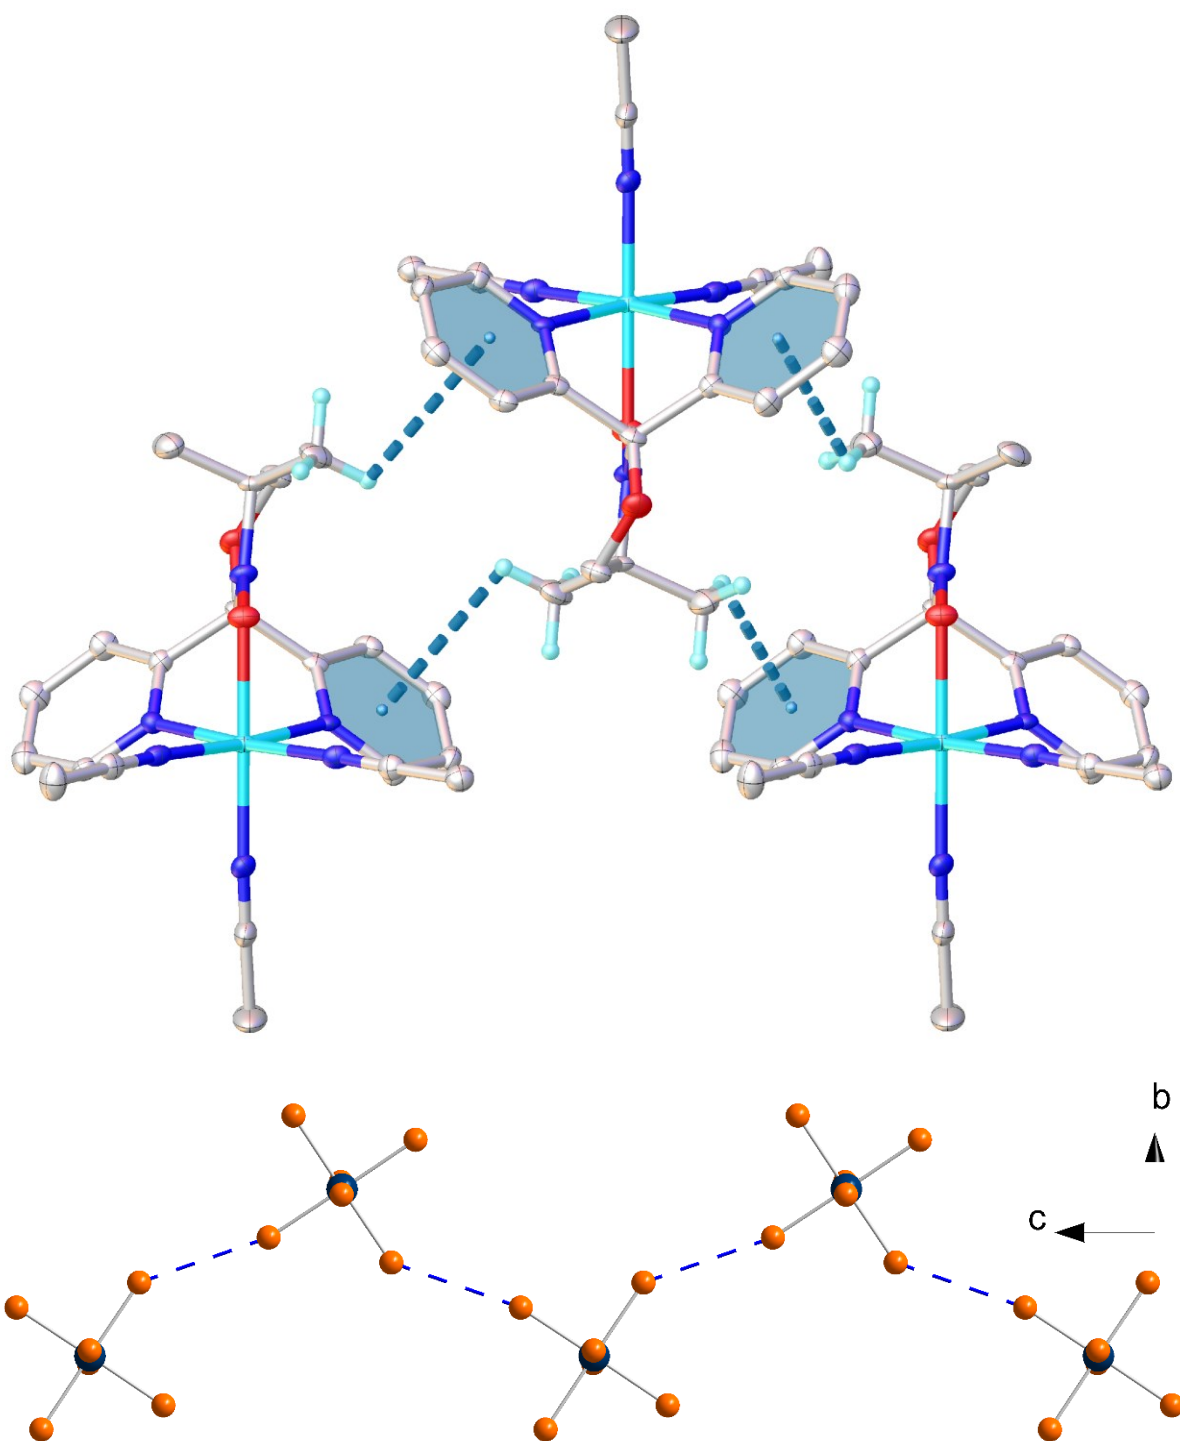

**Figure S11.** Intermolecular CH... $\pi$  (top) and Br...Br interactions (bottom) for complex **3b**. Selected hydrogens hidden for clarity. Colour code: Ni, cyan; N, blue; O, red; C, grey; H, cyan. Dashed lines represent the relevant intermolecular interaction.

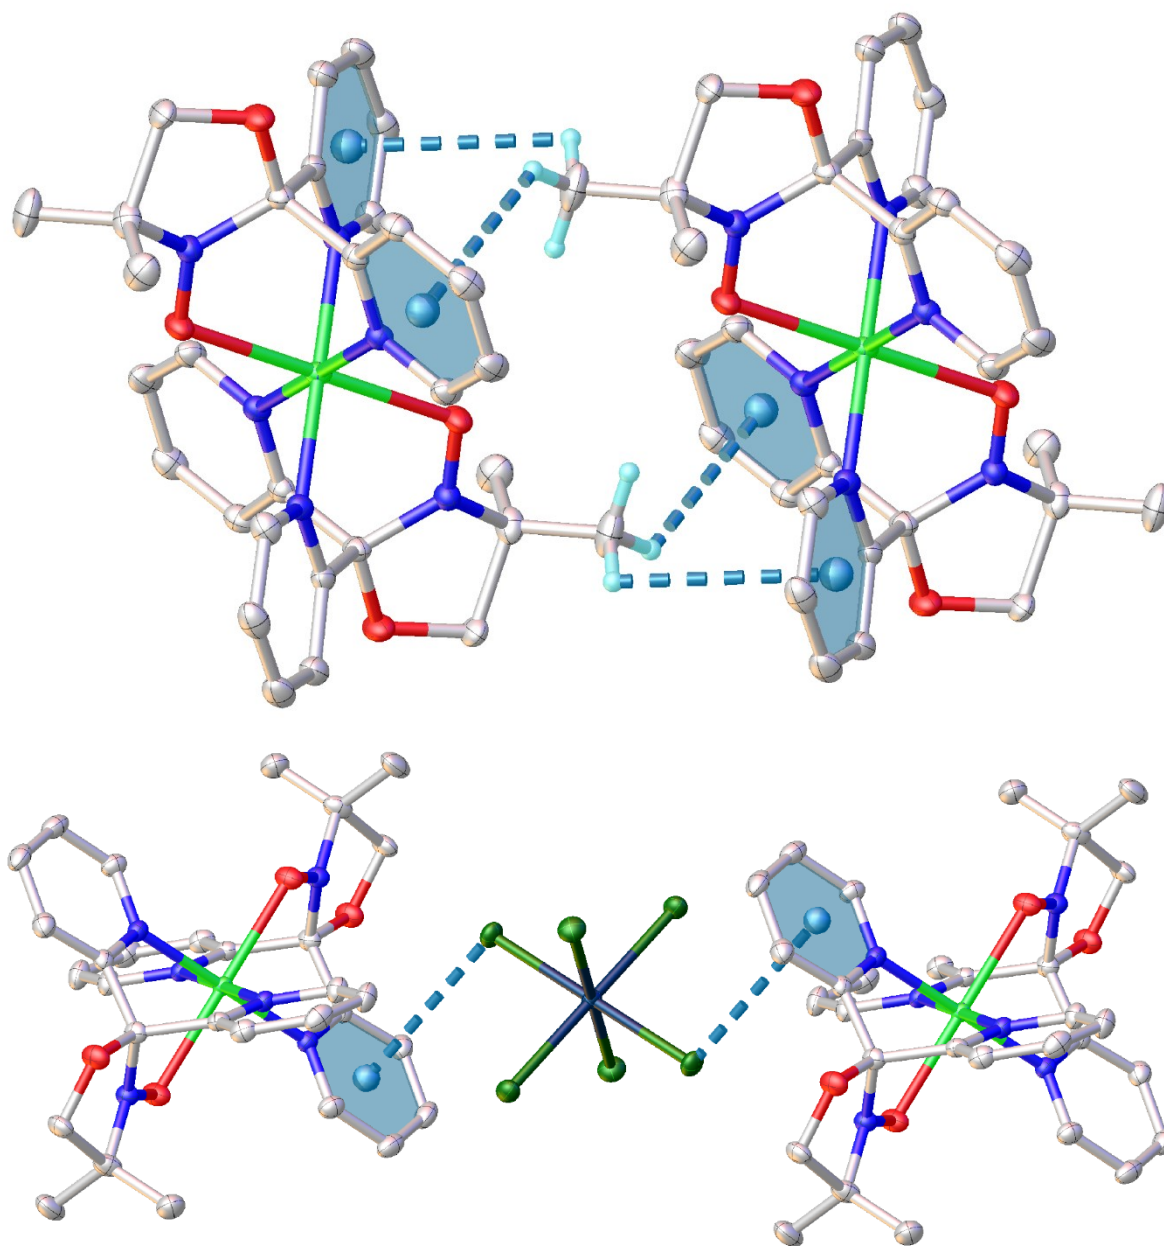

**Figure S12.** Intermolecular CH $\cdots\pi$  (top) and Cl $\cdots\pi$  (bottom) interactions for complex **4a**. Selected hydrogens and disordered second part of oxazolidine ring hidden for clarity. Colour code: Re, dark blue; Cu, green; Cl, dark green; N, blue; O, red; C, grey; H, cyan. Dashed lines represent the relevant intermolecular interaction.

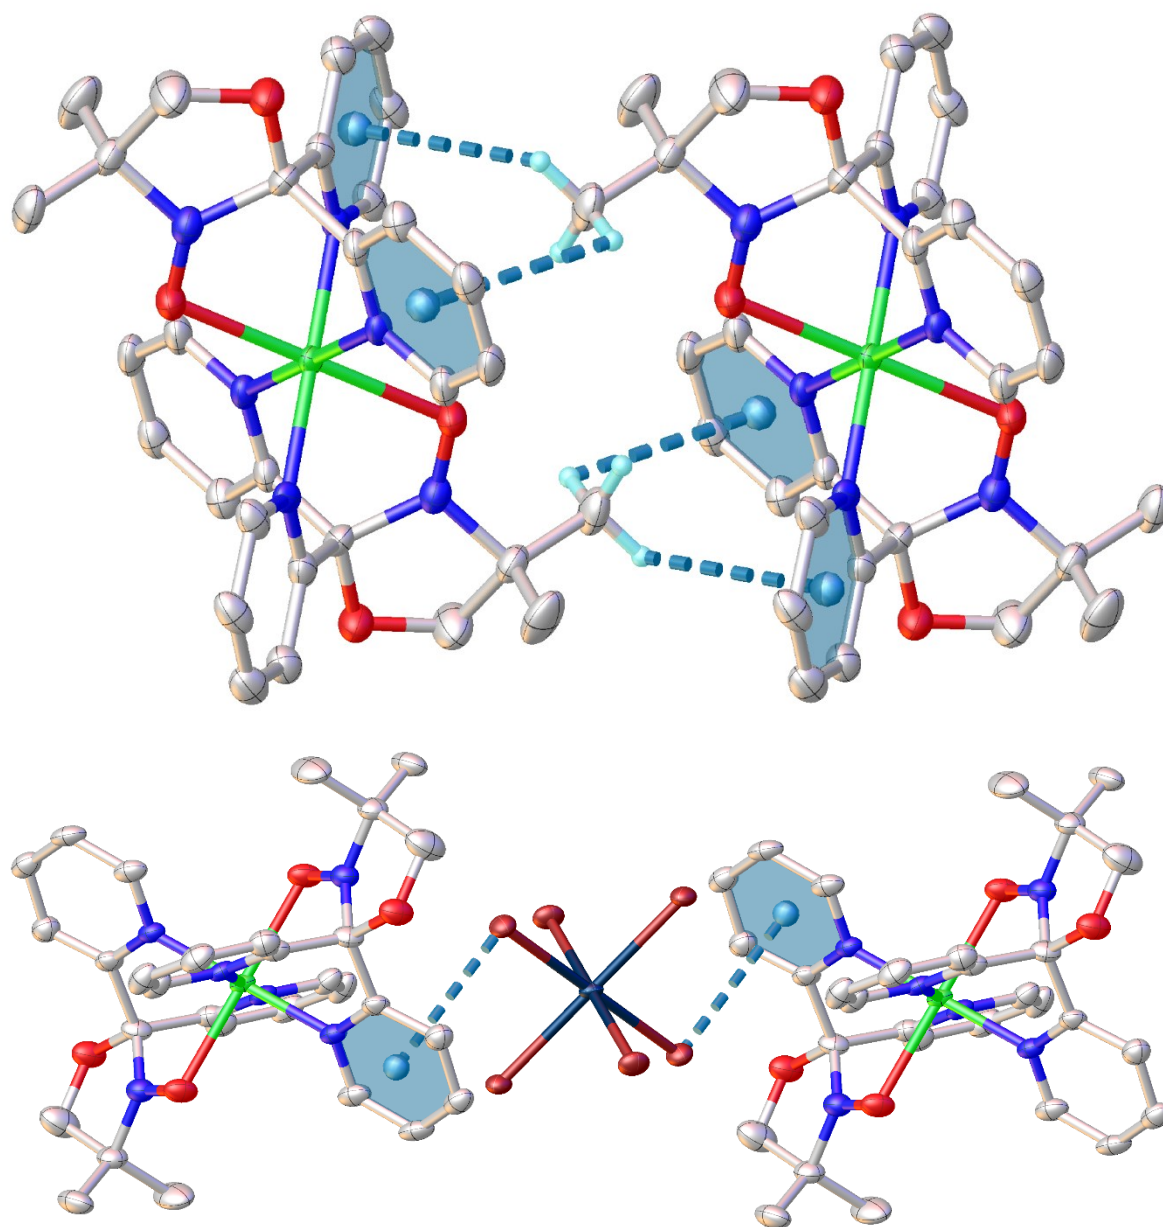

**Figure S13.** Intermolecular CH $\cdots\pi$  (top) and Br $\cdots\pi$  (bottom) interactions for complex **4b**. Selected hydrogens hidden for clarity. Colour code: Re, dark blue; Cu, green; Br, dark red; N, blue; O, red; C, grey; H, cyan. Dashed lines represent the relevant intermolecular interaction.



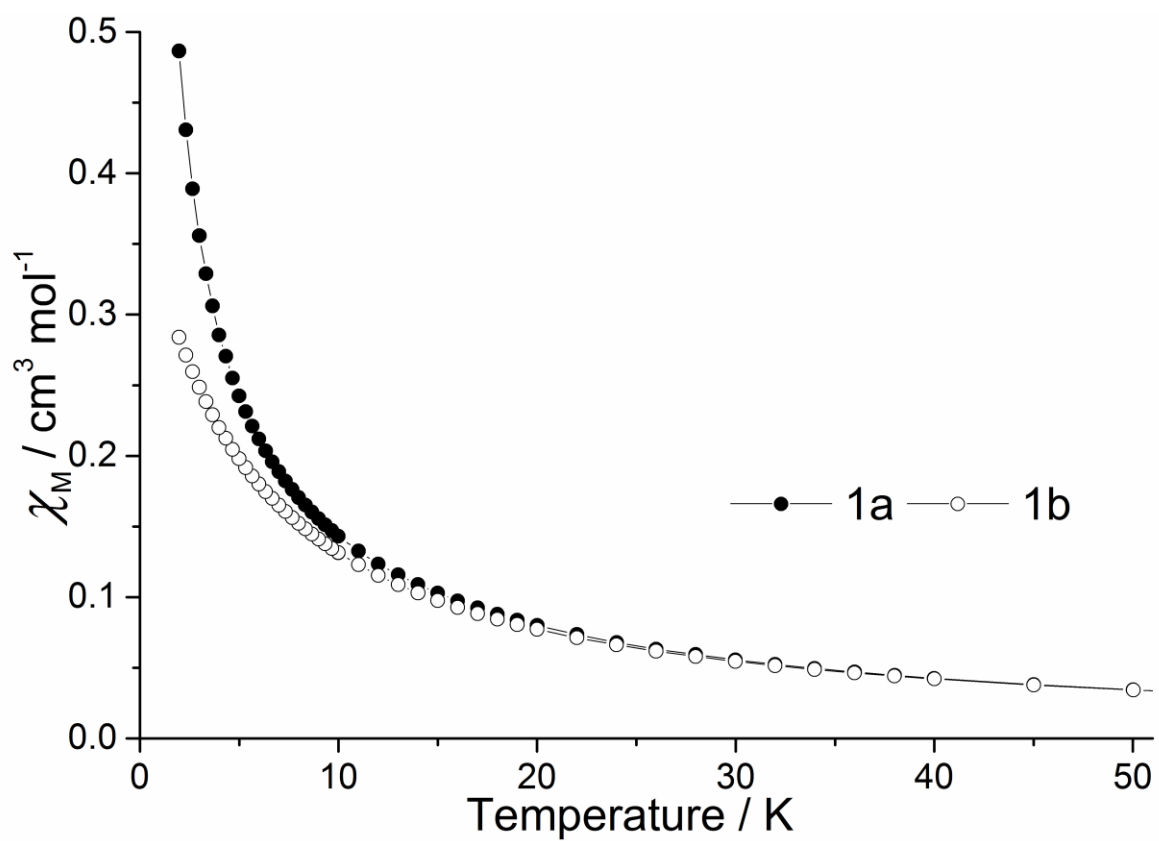

Figure S14. The  $\chi_M$  vs  $T$  plot for complex **1a** and **1b**.

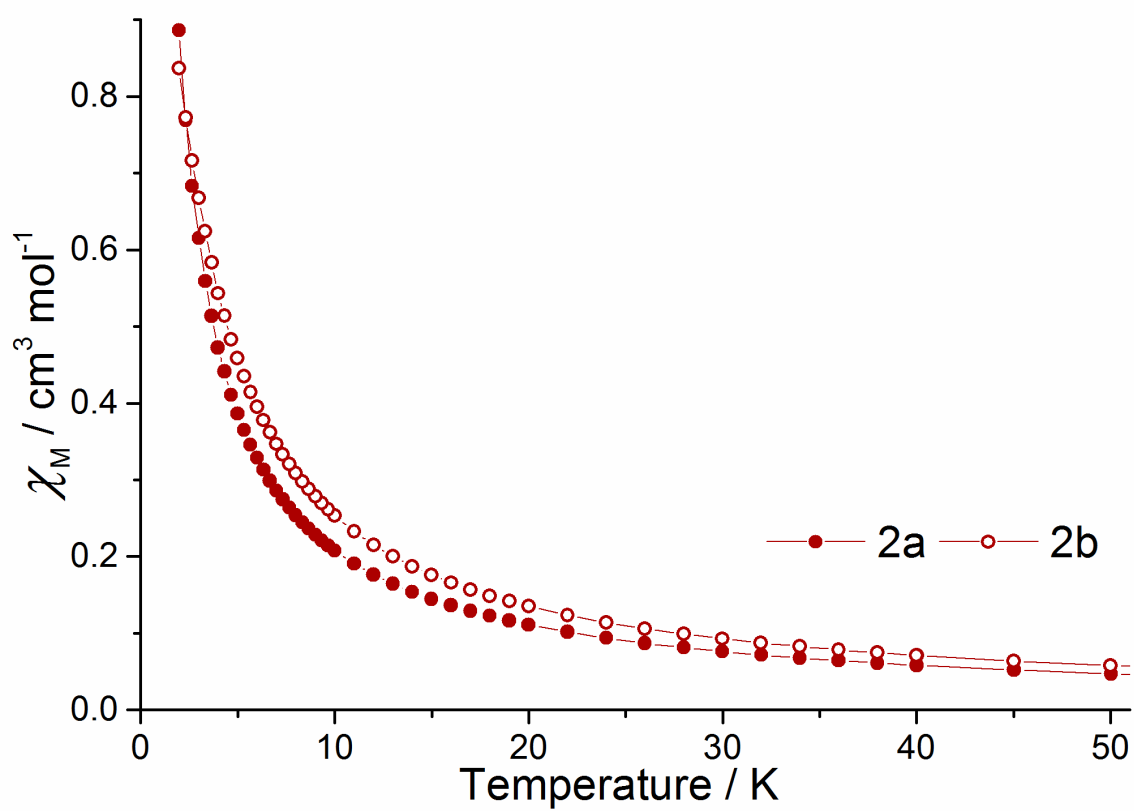

Figure S15. The  $\chi_M$  vs  $T$  plot for complex **2a** and **2b**.

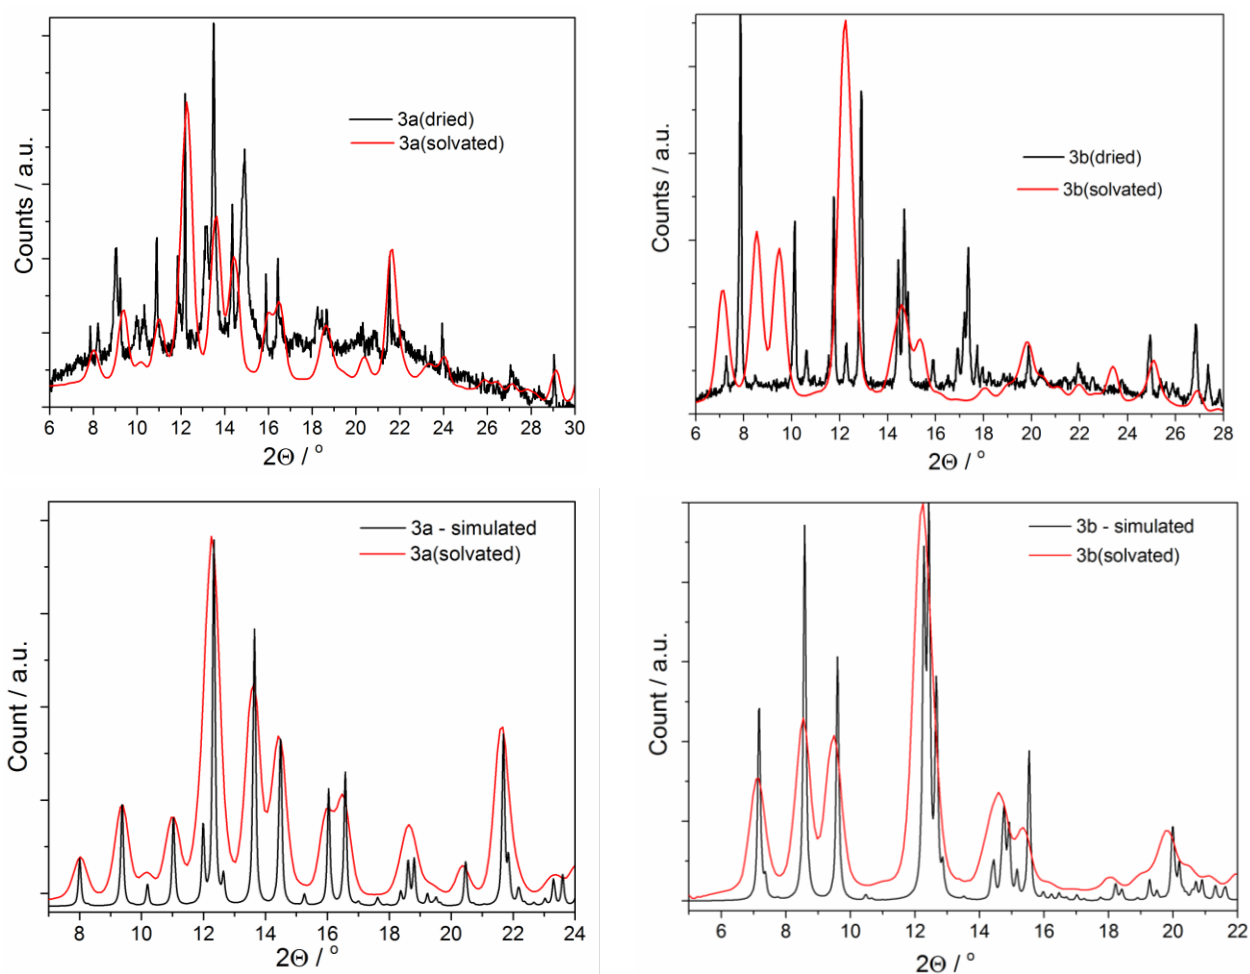

**Figure S16.** Powder X-ray diffraction (PXRD) experiments on **3a(dried)** (top left), **3b(dried)** (top right), **3a(solvated)** (bottom left) and **3b(solvated)** (bottom right) were performed on a Rigaku Oxford Diffraction SuperNova X-ray diffractometer at 298 K with a scan step size of  $0.086^\circ$  at a rate of  $1^\circ \text{ sec}^{-1}$ . Calculated patterns from single crystal data were made using Mercury 3.7.

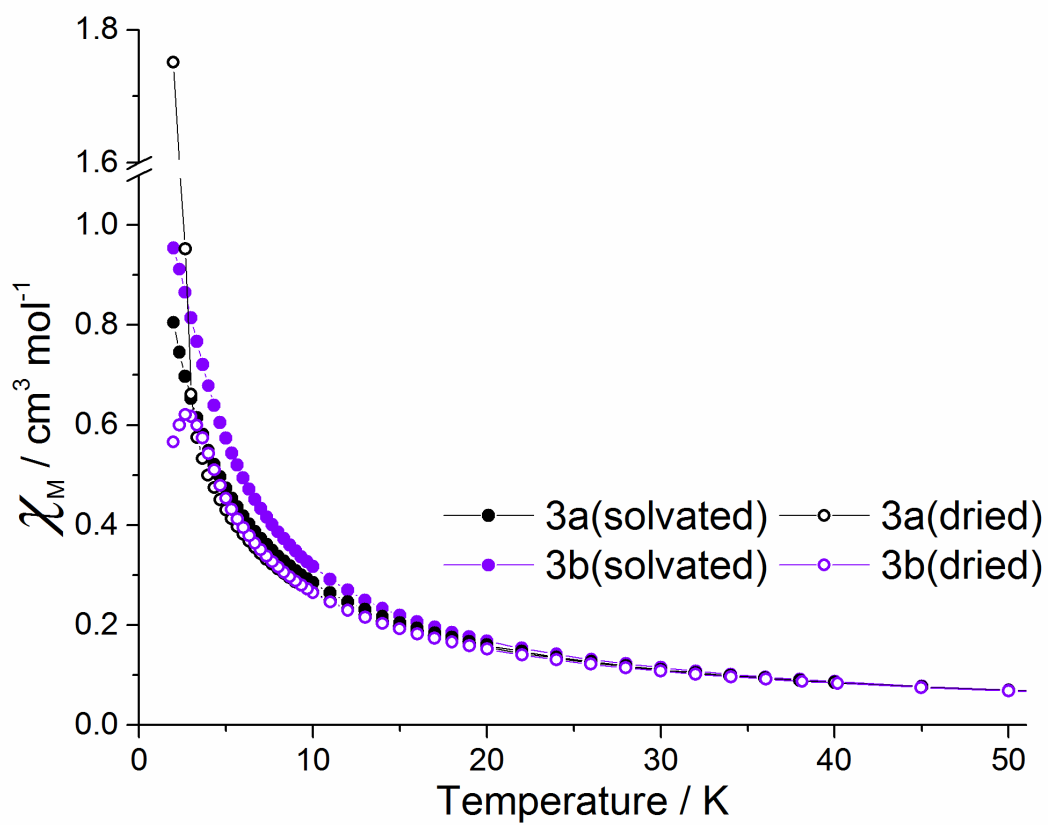

Figure S17. The  $\chi_M$  vs  $T$  plot for complex **3a** and **3b**, dried and solvated.

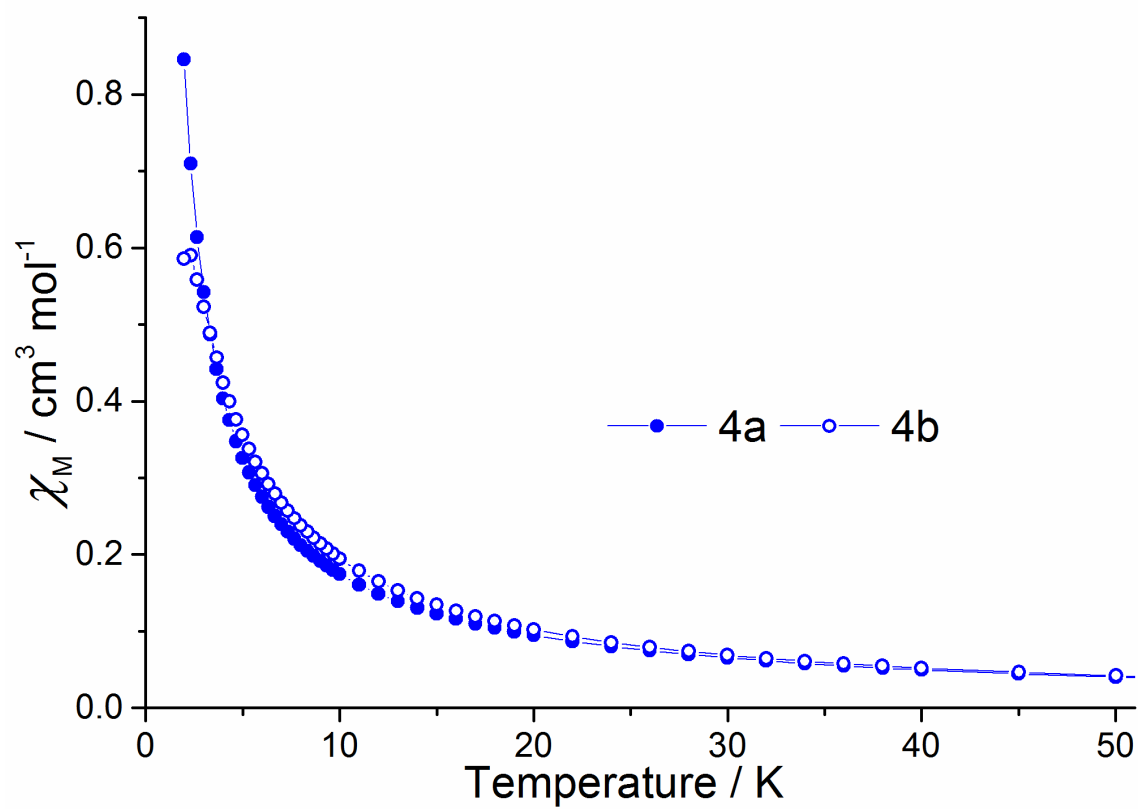

Figure S18. The  $\chi_M$  vs  $T$  plot for complex 4a and 4b.

## References

- 1 I. A. Gass, S. Tewary, A. Nafady, N. F. Chilton, C. J. Gartshore, M. Asadi, D. W. Lupton, B. Moubaraki, A. M. Bond, J. F. Boas, S. X. Guo, G. Rajaraman and K. S. Murray, *Inorg. Chem.*, 2013, **52**, 7557–7572.
- 2 I. A. Gass, S. Tewary, G. Rajaraman, M. Asadi, D. W. Lupton, B. Moubaraki, G. Chastanet, J.-F. Letard and K. S. Murray, *Inorg. Chem.*, 2014, **53**, 5055–5066.
- 3 T. Hamaguchi, M. D. Doud, J. Hilgar, J. D. Rinehart and C. P. Kubiak, *Dalt. Trans.*, 2016, **45**.
- 4 S.-G. Lee, K.-M. Park, Y. Habata and S. S. Lee, *Inorg. Chem.*, 2013, **52**, 8416–8426.
- 5 S. Liang, H. Wang, T. Deb, J. L. Petersen, G. T. Yee and M. P. Jensen, *Inorg. Chem.*, 2012, **51**, 12707–12719.
- 6 J. Cho, Y.-M. Lee, S. Y. Kim and W. Nam, *Polyhedron*, 2010, **29**, 446–450.
- 7 E. S. Wiedner, J. Y. Yang, W. G. Dougherty, W. S. Kassel, R. M. Bullock, M. R. Dubois and D. L. Dubois, *Organometallics*, 2010, **29**, 5390–5401.
- 8 Z. Zhang, Z.-R. Geng, X.-W. Kan, Q. Zhao, Y.-Z. Li and Z.-L. Wang, *Inorganica Chim. Acta*, 2010, **363**, 1805–1812.
- 9 W.-Z. Lee, H.-S. Tseng and T.-S. Kuo, *Dalt. Trans.*, 2007, 2563.
- 10 R. D. Köhn, M. Haufe and G. Kociok-Köhn, *J. Am. Chem. Soc.*, 2006, **128**, 10682–10683.
- 11 K. Uehara, S. Hikichi and M. Akita, *J. Chem. Soc. Dalt. Trans.*, 2002, **75**, 3529.
